# Supplementary material for: A synergistic bimetallic MOF/MWCNT nanocomposite for sensitive electrochemical detection of baicalin
Source: Royal Society of Chemistry journal article supplement (doi:10.1039/d5an01276g), 2026-01-01
Supplement: d5an01276g1.pdf [file d5an01276g1.pdf]

## A synergistic bimetallic MOF/MWCNT nanocomposite for sensitive electrochemical detection of baicalin

Yijie Zhang,<sup>a</sup> Yongxin Tao,<sup>\*a</sup> Shan Li,<sup>a</sup> Yong Qin<sup>a</sup> and Jinmin Wang<sup>\*a,b</sup>

<sup>a</sup> School of Petrochemical Engineering, Changzhou University, Changzhou, 213164 P. R. China

<sup>b</sup> School of Materials Science & Engineering, Changzhou University, Changzhou, 213164 P. R. China

\* Corresponding author

Email: taoyx@cczu.edu.cn; wjm@cczu.edu.cn

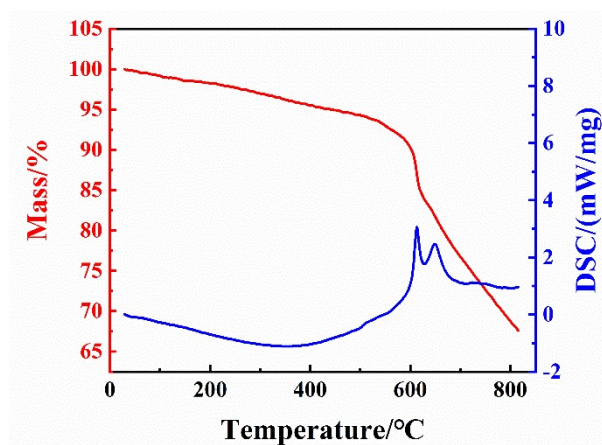

Fig. S1. TG-DSC curves of ZnNi-MOF@MWCNT.

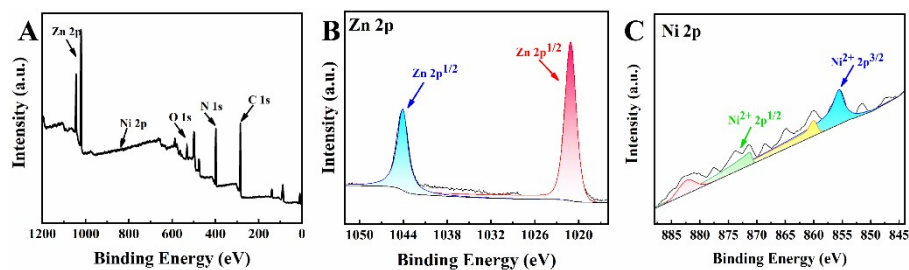

**Fig. S2** (A) XPS survey, (B) Zn 2p and (C) Ni 2p spectrum of ZnNi-MOF@MWCNT.

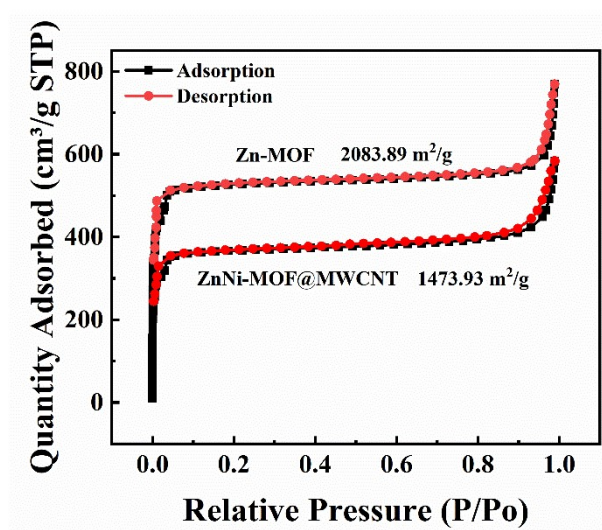

**Fig. S3.** N<sub>2</sub> adsorption-desorption isotherms of Zn-MOF and ZnNi-MOF@MWCNT.

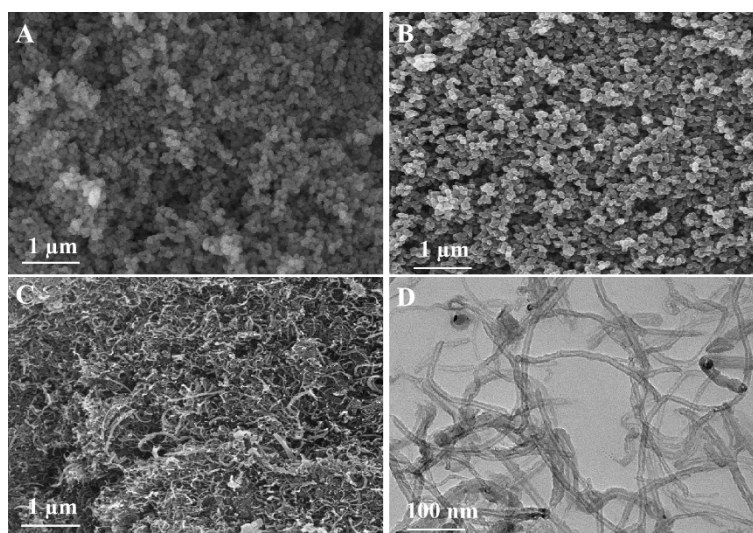

**Fig. S4.** SEM images of (A) Zn-MOF, (B) ZnNi-MOF and (C) MWCNT. (D) TEM images of MWCNT.

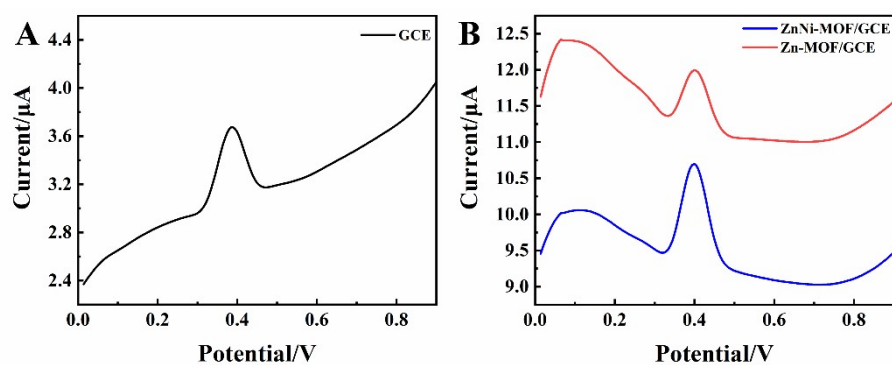

**Fig. S5.** Differential pulse voltammograms (DPV) of GCE, ZnNi-MOF/GCE, and Zn-MOF/GCE in 0.1 M PBS (pH = 2.5) containing  $3 \times 10^{-7}$  M Bn.

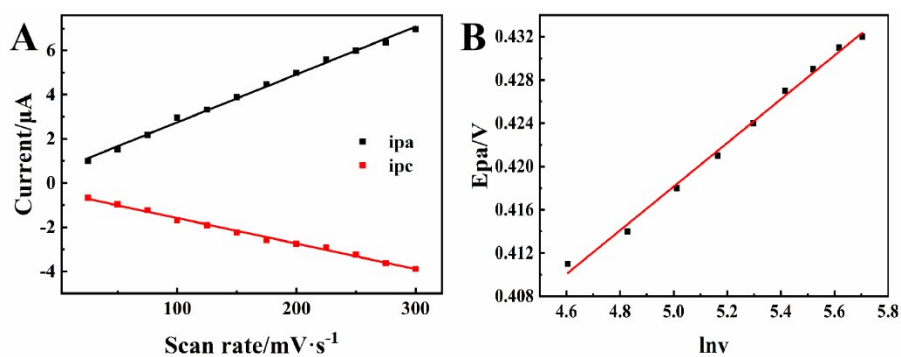

**Fig. S6.** (A) Relationship between oxidation peak potential and  $\ln v$ . (B) Relationship between redox peak current and scan rate ( $v$ ).

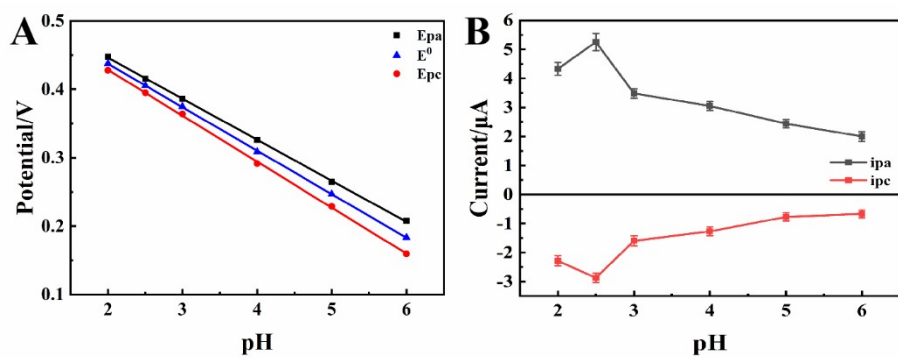

**Fig. S7.** (A) Relationship between oxidation peak potential ( $E_{pa}$ ), formal potential ( $E^0$ ), and reduction peak potential ( $E_{pc}$ ) with pH. (B) Relationship between redox peak current and pH.

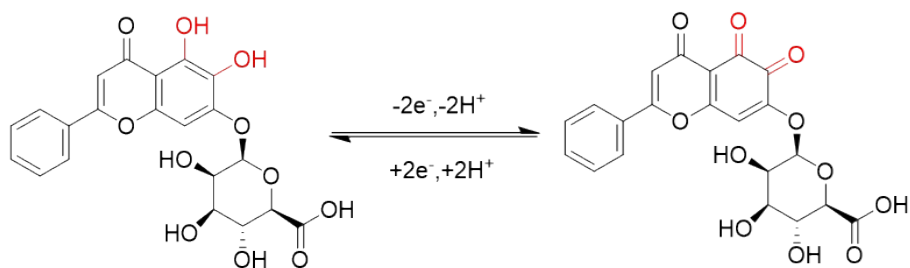

**Fig. S8.** The redox process of Bn on ZnNi-MOF@MWCNT/GCE.

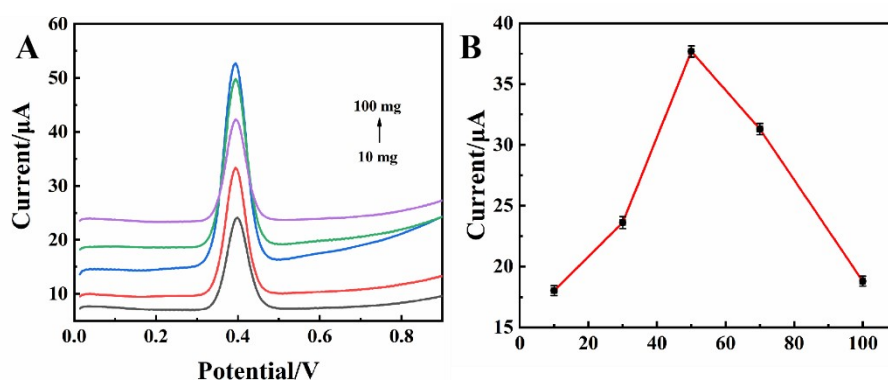

**Fig. S9.** (A) DPV curves of different MWCNT addition amounts. (B) Effect of the addition amount of MWCNT on the oxidation peak current of  $3 \times 10^{-7}$  M Bn.

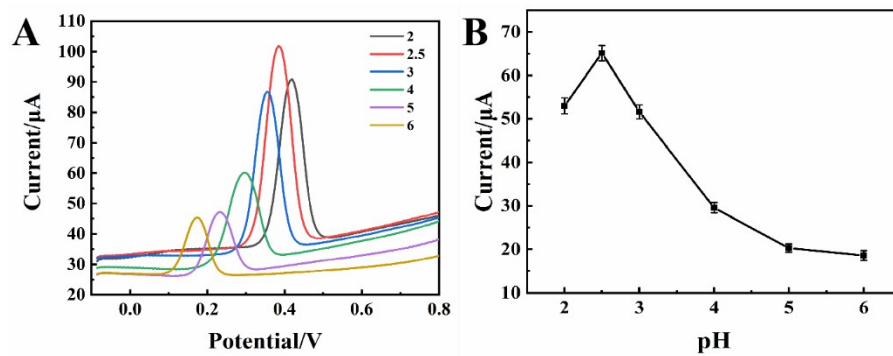

**Fig. S10.** (A) DPV of ZnNi-MOF@MWCNT/GCE in 0.1 M PBS containing  $5 \times 10^{-7}$  M Bn at different pH values (2, 2.5, 3, 4, 5 and 6). (B) Relationship between oxidation peak current and pH.

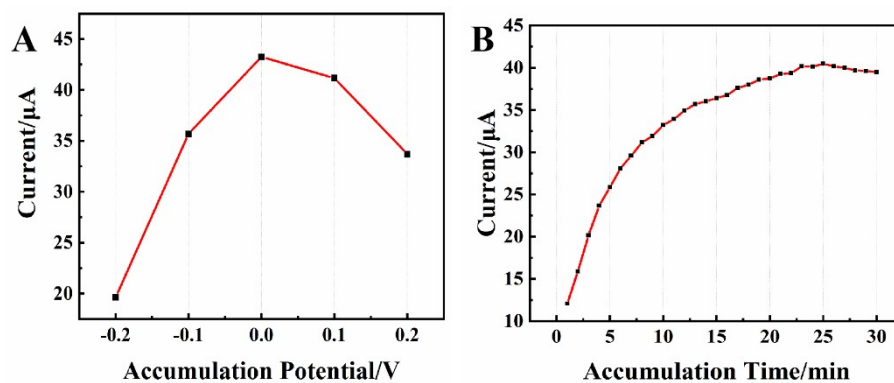

**Fig. S11.** Effect of (A) accumulation potential and (B) accumulation time on the oxidation peak current of  $3 \times 10^{-7}$  M Bn.

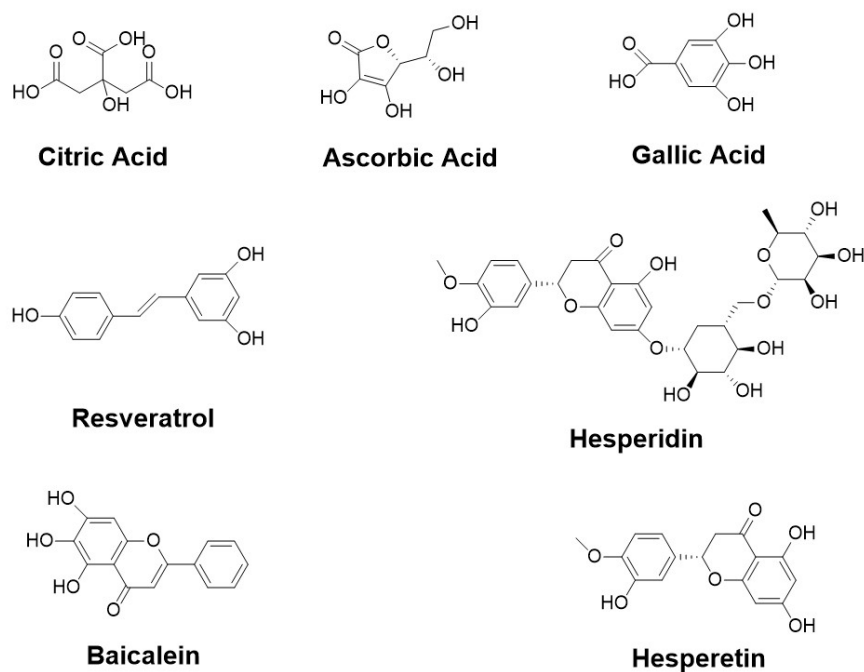

**Fig. S12.** Chemical structures of different polyphenolic compounds.

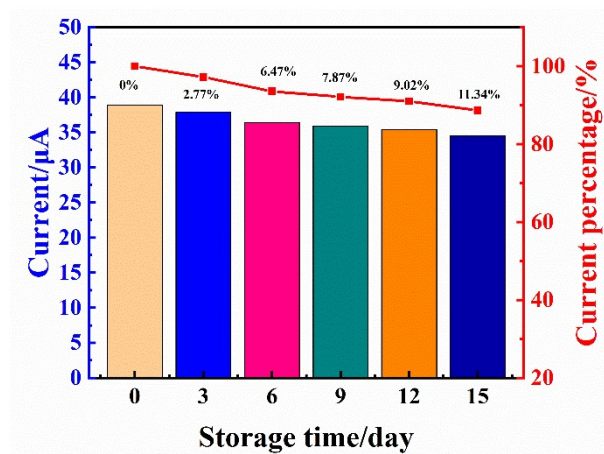

**Fig. S13.** DPV responses of same ZnNi-MOF@MWCNT/GCE at different storage times.
